# Supplementary material
Source: MDPI journal article supplement (https://www.mdpi.com/2073-4395/11/8/1657)
Supplement: s1 [file s1]

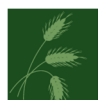

**Table S1.** Land-use statistics of each watershed

| Main Watershed            | Land-Use Type (km <sup>2</sup> ) |        |       |           |                                        |
|---------------------------|----------------------------------|--------|-------|-----------|----------------------------------------|
|                           | Cropland                         | Forest | Urban | Grassland | Other<br>(Bareland,<br>Wetland, Water) |
| Tumen River               | 2,449                            | 7,318  | 57    | 556       | 63                                     |
| Yalu River                | 5,329                            | 23,030 | 82    | 3,002     | 334                                    |
| Northeastern Basin        | 2,164                            | 16,173 | 143   | 2,541     | 99                                     |
| Chongchon River           | 5,290                            | 6,272  | 110   | 821       | 152                                    |
| Taedong River             | 10,242                           | 8,370  | 412   | 2,062     | 353                                    |
| Eastern Basin             | 2,000                            | 4,075  | 41    | 244       | 78                                     |
| Ryesong River             | 3,560                            | 1,931  | 30    | 1,306     | 124                                    |
| Han River                 | 8,166                            | 23,530 | 951   | 1,049     | 645                                    |
| Han River: east sea       | 333                              | 2,760  | 85    | 165       | 13                                     |
| Han River: west sea       | 1,025                            | 381    | 215   | 175       | 47                                     |
| Anseong River             | 1,066                            | 366    | 138   | 46        | 45                                     |
| Sapgyo River              | 993                              | 471    | 48    | 121       | 33                                     |
| Geum River                | 3,720                            | 4,939  | 212   | 829       | 212                                    |
| Geum River: west sea      | 1,721                            | 769    | 83    | 207       | 126                                    |
| Nakdong River             | 6,849                            | 15,054 | 605   | 771       | 383                                    |
| Nakdong River: east sea   | 425                              | 2,235  | 87    | 74        | 14                                     |
| Nakdong River: south sea  | 674                              | 1,062  | 224   | 293       | 18                                     |
| Mankyung–Dongjin Rivers   | 1,770                            | 871    | 128   | 156       | 261                                    |
| Hyungsan River            | 334                              | 727    | 61    | -         | 16                                     |
| Sumjin River              | 1,770                            | 2,793  | 41    | 376       | 95                                     |
| Sumjin River: south sea   | 1,450                            | 1,316  | 135   | 229       | 83                                     |
| Taehwa River              | 161                              | 417    | 72    | -         | 5                                      |
| Yeongsan River            | 1,783                            | 1,157  | 153   | 286       | 91                                     |
| Yeongsan River: west sea  | 1,194                            | 514    | 69    | 123       | 161                                    |
| Yeongsan River: south sea | 855                              | 436    | 62    | 13        | 95                                     |
| Huiya–Sooyoung            | 169                              | 457    | 198   | 4         | 8                                      |
| Tamjin River              | 164                              | 269    | 62    | 61        | 9                                      |
| Jeju Island               | 1,267                            | 177    | 78    | 294       | 1                                      |
